# Supplementary material for: Quadrupole coupling constants and isomeric Mössbauer shifts for inorganic compounds and complexes containing elements from period V calculated by ab initio methods
Source: Royal Society of Chemistry journal article supplement (doi:10.1039/b000039f), 2000-01-01
Supplement: tables1.doc [file tables1.doc]

**Table S1. The calculated (using B3LYP/3-21G*) and experimental QCC and Uр** values for halogen atoms

| COMPOUND | **NUCLEI** | **e2Qqzzexp., MHz** | **e2Qqzzcal., MHz** | **Upexp.** | **Upcal.** |
| --- | --- | --- | --- | --- | --- |
| Сl2 | 35Cl | 108.5 | 98.9 | 0.989 | 0.901 |
| Br2 | 79Br | 810 | 750 | 1.052 | 0.974 |
| I2 | 127I | 2453 | 2304 | 1.070 | 1.005 |
| F2 | 19F* | 127.2 | 98.0 | 0.978 | 0.753 |
| BrCl | 35Cl  79Br | 103.6  877 | 89.3 827 | 0.944 1.139 | 0.814 1.074 |
| ClF | 35Cl | 145.9 | 117.3 | 1.329 | 1.069 |
| IBr | 127I  79Br | 2731 697 | 2554 672 | 1.191 0.905 | 1.114 0.873 |
| IF | 127I | 3438 | 3048 | 1.499 | 1.329 |
| ICl | 127I  35Cl | 2930 82.5 | 2761 78.3 | 1.278 0.752 | 1.204 0.714 |
| HI | 127I | 1823 | 1822 | 0.795 | 0.794 |
| HF | 19F* | 40 | 58 | 0.308 | 0.446 |
| Cl3- | 35Cl | 118 58 | 106 51 | 1.075 0.528 | 0.969 0.466 |
| BrCl2- | 35Cl | 48 | 44.8 | 0.437 | 0.408 |
| Br3- | 79Br | 814 371 | 803 372 | 1.057 0.482 | 1.043 0.483 |
| ICl2- | 127I  35Cl | 3050  40 | 2797 40.6 | 1.330 0.364 | 1.220 0.370 |
| I3- | 127I | 2478 1142 | 2448 1119 | 1.081 0.498 | 1.068 0.488 |
| ICl4- | 127I  35Cl | 3113 45.1 | 2766  47.2 | 1.358 0.411 | 1.206 0.430 |
| Cl2- | 35Cl | 54.6 | 46.4 | 0.498 | 0.423 |
| Br2- | 79Br | 382 | 352 | 0.496 | 0.457 |
| IBr2- | 127I  79Br | 2770 322 | 2575 343 | 1.208 0.418 | 1.123 0.445 |
| CF4 | 19F* | 59.7 | 47.6 | 0.459 | 0.366 |
| CI4 | 127I | 2102 | 2256 | 0.917 | 0.984 |
| CHI3 | 127I | 2029 | 2107 | 0.885 | 0.919 |
| CH2I2 | 127I | 1920 | 1980 | 0.837 | 0.863 |
| CH3I | 127I | 1739 | 1864 | 0.758 | 0.813 |
| KI | 127I | 0 | 250 | 0 | 0.109 |
| BI3 | 127I | 1242 | 1209 | 0.542 | 0.527 |
| BF3 | 19F* | 30.2 | 25.3 | 0.232 | 0.195 |
| AlF3 | 19F* | 25.5 | 12.9 | 0.196 | 0.099 |
| GaF3 | 19F* | 30.7 | 24.6 | 0.236 | 0.189 |
| InF3 | 19F* | 25.8 | 23.4 | 0.198 | 0.180 |
| SiF4 | 19F* | 23.5 | 20.3 | 0.181 | 0.156 |
| SiI4 | 127I | 1335 | 1365 | 0.582 | 0.595 |
| GeF4 | 19F* | 36.2 | 29.4 | 0.278 | 0.226 |
| GeI4 | 127I | 1500 | 1491 | 0.654 | 0.650 |
| SnI4 | 127I | 1364 | 1381 | 0.595 | 0.602 |
| SF6 | 19F* | 60 | 46.5 | 0.461 | 0.358 |
| SeF6 | 19F* | 55.7 | 44.2 | 0.428 | 0.340 |
| TeF6 | 19F* | 42.7 | 36.2 | 0.328 | 0.278 |
| NF3 | 19F* | 82.7 | 66.3 | 0.636 | 0.510 |
| PF3 | 19F* | 31.9 | 22.7 | 0.245 | 0.175 |
| AsF3 | 19F* | 32.8 | 27.3 | 0.252 | 0.210 |
| SbF3 | 19F* | 26.8 | 22.7 | 0.206 | 0.175 |

**Table S2. The experimental and calculated NQR and Mössbauer parameters for Sb compounds**

| **Compound** | **e2QqzzSb(exp.) [MHz]** | **e2QqzzSb(cal.)**  **[MHz]** | **, mm/s, relative to CaSnO3** | **NsSb** | **NpSb** |
| --- | --- | --- | --- | --- | --- |
| SbH3 | 459 | 343 | - | - | - |
| SbF3 | 537 | 387 | -14.9 | 1.676 | 1.871 |
| SbCl3 | 384 | 283 | -14.4 | 1.460 | 2.081 |
| SbBr3 | 316 | 286 | -14.42 | 1.465 | 2.283 |
| SbI3 | 85 | 211 | -15.84 | 1.489 | 2.503 |
| Sb2Cl10 | 180 | 135 | -3.1 | 0.771 | 1.976 |
| SbCl5.OPCl3 | 204 | 199 | -2.67 | 0.744 | 1.907 |
| SbCl5.NCCl | 236 | 184 | -2.87 | 0.761 | 1.919 |
| SbCl5.NCCH3 | 216 | 175 | -2.66 | 0.753 | 1.910 |
| SbCl5.NCCCl3 | 225 | 178 | -3.01 | 0.751 | 1.914 |
| SbCl3.C6H5NH2 | 326 | 262 | -14.8 | 1.467 | 2.002 |
| SbCl3.C6H6 | 390 | 213 | -14.2 | 1.482 | 2.022 |
| SbSBr | 336 | 279 | - | - | - |
| SbSI | 312 | 285 | - | - | - |
| SbF4- | 467 | 310 | - | - | - |
| SbCl4- | 267 | 123 | -16.0 | 1.501 | 1.943 |
| SbBr4- | 138 | 93 | -16.6 | 1.534 | 2.164 |
| SbI4- | 99 | 26 | -15.9 | 1.551 | 2.312 |
| SbCl6- | 0 | 0 | -2.74 | 0.708 | 1.874 |
| SbCl5Br- | - | 10 | -2.94 | 0.715 | 1.893 |
| SbMe3 | 495 | 360 | - | - | - |
| SbMe3Cl2 | 663 | 202 | -6.0 | 1.010 | 2.126 |

**Table S3. Isomeric shift experimental and Sn populations calculated by B3LYP/3-21G***

| Compound | , mm/s, relative to SnO2 | Ns, e | Np, e | Ns2 | NsNp |
| --- | --- | --- | --- | --- | --- |
| SnBr4 | 1.03 | 0.894 | 1.848 | 0.799 | 1.652 |
| SnCl4 | 0.75 | 0.792 | 1.648 | 0.627 | 1.305 |
| SnI4 | 1.39 | 0.940 | 2.030 | 0.884 | 1.908 |
| MeSnBr3 | 1.41 | 0.959 | 1.801 | 0.920 | 1.727 |
| MeSnCl3 | 1.25 | 0.896 | 1.632 | 0.803 | 1.462 |
| MeSnI3 | 1.50 | 0.998 | 1.932 | 0.996 | 1.924 |
| SnI62- | 1.23 | 0.824 | 1.570 | 0.679 | 1.294 |
| SnI4Cl22- | 0.99 | 0.702 | 1.472 | 0.493 | 1.033 |
| SnCl4I22- | 0.78 | 0.652 | 1.397 | 0.425 | 0.911 |
| SnBr62- | 0.84 | 0.629 | 1.520 | 0.396 | 0.956 |
| SnBr4Cl22- | 0.77 | 0.643 | 1.465 | 0.413 | 0.942 |
| SnCl4Br22- | 0.67 | 0.637 | 1.401 | 0.406 | 0.892 |
| SnBr4I22- | 0.96 | 0.635 | 1.502 | 0.403 | 0.954 |
| SnI4Br22- | 1.09 | 0.689 | 1.516 | 0.475 | 1.045 |
| SnCl62- | 0.52 | 0.611 | 1.337 | 0.373 | 0.817 |
| SnCl4.2MeCN | 0.38 | 0.713 | 1.482 | 0.493 | 1.015 |
| SnCl4.2Me2S | 0.44* | 0.585 | 1.373 | 0.342 | 0.803 |

* This value was taken from correlation between ClK shifts and isomeric shifts of SnCl4L2 complexes [34].
